# Supplementary material for: Subtype-specific responses of hKv7.4 and hKv7.5 channels to polyunsaturated fatty acids reveal an unconventional modulatory site and mechanism
Source: eLife. 2022 Jun 1;11:e77672. doi: 10.7554/eLife.77672 (PMC9159753; doi:10.7554/eLife.77672)
Supplement: Figure 1—source data 1. [file elife-77672-fig1-data1.xlsx]

## Sheet: Figure 1
Kv7.5 - DV50 DHA							Kv7.4 - DV50 DHA
	0,7 uM	2,1 uM	7 uM	21 uM	70 uM			0,7 uM	2,1 uM	7 uM	21 uM	70 uM
	-0.17	-8.45	-4.85	-13.02	-26.3			2.5865	9.441	8.93	10.348	20.578
	-0.5	-2.45	-10.34	-20.24	-17.94			2.46	9.3364	10.492	9.192	4.926
	-4.66	-7.8	-0.04	-15.11	-24.96			-0.76	4.182	15.983	5.508	18.02
			-11.15		-9.26			-0.724	3.328	3.312	3.27	21.856
			-10.86		-23.33			-1.31	-0.758	10.389	5.59	16.902
			-9.11		-18.21			0.3231	0.3595	10.322		7.785
			-9.56		-33.7			0.286	-0.473	4.492		7.6577
			-7.66		-15.1			-0.838	-0.171	2.233		10.217
			-12.99		-17.16			0.927	1.59	-2.132		11.804
					-18.9					-0.3336		4.2754
					-26.9					-0.36		9.792
					-26					-0.55		5.446
										0.117		11.268
												13.85
												12.79
