# Supplementary material for: Subtype-specific responses of hKv7.4 and hKv7.5 channels to polyunsaturated fatty acids reveal an unconventional modulatory site and mechanism
Source: eLife. 2022 Jun 1;11:e77672. doi: 10.7554/eLife.77672 (PMC9159753; doi:10.7554/eLife.77672)
Supplement: Figure 2—source data 1. [file elife-77672-fig2-data1.xlsx]

## Sheet: Figure 2
Kv7.5 - DV50					Kv7.4 - DV50
	DHA	DHA-me	DHA+			DHA	DHA-me	DHA+
	-26.3	-0.66	0.3			20.578	2.52	-1.07
	-17.94	0.8	1.7			4.926	1.66	-2.44
	-24.96	-2.02	2.1			18.02	1.21	5.95
	-9.26	0.37	5.7			21.856	0.77	2.53
	-23.33	-0.65	3			16.902	-1.72	7.66
	-18.21	0.91	3.5			7.785	7.29	3.46
	-33.7		5			7.6577	3.105	-0.93
	-15.1		5.3			10.217	-5.678	-1.2
	-17.16		9.8			11.804		2.71
	-18.9		8.9			4.2754		5.98
	-26.9					9.792		0.49
	-26					5.446
						11.268
						13.85
						12.79
