# Supplementary material for: Subtype-specific responses of hKv7.4 and hKv7.5 channels to polyunsaturated fatty acids reveal an unconventional modulatory site and mechanism
Source: eLife. 2022 Jun 1;11:e77672. doi: 10.7554/eLife.77672 (PMC9159753; doi:10.7554/eLife.77672)
Supplement: Figure 3—source data 1. [file elife-77672-fig3-data1.xlsx]

## Sheet: Figure 3
Kv7.5 - DV50 PUFAs									Kv7.4 - DV50 PUFAs
	TTA	HTA	LA	AA	EPA	DHA	AA+			TTA	HTA	LA	AA	EPA	DHA	AA+
	0.6	-18.19	-8.21	-11.1	-6.93	-26.3	4.5			3.52	-1.58	8.773	1.55	8.96	20.578	5.63
	-3.72	-19.66	-10.83	-5.7	-18.23	-17.94	-0.43			-1.94	12.963	-3.24	2.82	18.942	4.926	5.33
	-2.04	-12.8	-17.95	-3.4	-11.88	-24.96	-5.62			-0.2	1.04	19.572	5.14	8.727	18.02	7.33
	-5.74	-21.08	-8.09	-9.9	-19.71	-9.26	2.06			2.41	12.36	8.6999	6.98	12.52	21.856	5.71
	-6.65	-10.43	-3.58	-14.7	-20.92	-23.33	2.73			0.17	11	3.241	1.82	21.3	16.902	5.48
	-3.9	-12.18	-5.06	-10.7	-24.86	-18.21	3.31			4.621	11.79	3.95	0.15	15.7	7.785	-3.45
	-4.19	-15.26	-7.37		-22.45	-33.7	1.2			8.351	11.71	13.301		10.93	7.6577	8.76
		-18.95				-15.1	7.68			7.599	9.53	12.268			10.217	15.51
						-17.16									11.804
						-18.9									4.2754
						-26.9									9.792
						-26									5.446
															11.268
															13.85
															12.79
