# Supplementary material for: Subtype-specific responses of hKv7.4 and hKv7.5 channels to polyunsaturated fatty acids reveal an unconventional modulatory site and mechanism
Source: eLife. 2022 Jun 1;11:e77672. doi: 10.7554/eLife.77672 (PMC9159753; doi:10.7554/eLife.77672)
Supplement: Figure 4—source data 1. [file elife-77672-fig4-data1.xlsx]

## Sheet: Figure 4
DV50 DHA						DV50 DHA
	Kv7.4	Kv7.5	Kv7.4/7.5	Kv7.4/E4		Kv7.4 WT	Kv7.4 F182L	Kv7.4 S273A
	20.578	-26.3	-2	7.15		20.578	6.29	6.621
	4.926	-17.94	4.1	4.72		4.926	0.75	5.02
	18.02	-24.96	-2.8	13.2		18.02	2.57	4.555
	21.856	-9.26	1.2	8.59		21.856	2.455	5.569
	16.902	-23.33	-0.9	11.93		16.902	5.396	1.768
	7.785	-18.21	-2.5	5.24		7.785	15.681
	7.6577	-33.7	-1.1	11.87		7.6577
	10.217	-15.1	0.2			10.217
	11.804	-17.16	0			11.804
	4.2754	-18.9	-0.4			4.2754
	9.792	-26.9				9.792
	5.446	-26				5.446
	11.268					11.268
	13.85					13.85
	12.79					12.79
