# Supplementary material for: Subtype-specific responses of hKv7.4 and hKv7.5 channels to polyunsaturated fatty acids reveal an unconventional modulatory site and mechanism
Source: eLife. 2022 Jun 1;11:e77672. doi: 10.7554/eLife.77672 (PMC9159753; doi:10.7554/eLife.77672)
Supplement: Figure 5—source data 1. [file elife-77672-fig5-data1.xlsx]

## Sheet: Figure 5
Kv7.5 - DV50 DHA
	pH 6.5	pH 7	pH 7.4	pH 8.2
	-3	-12.7	-26.3	-47.6
	-0.5	-8.6	-17.94	-45.9
	0.7	-8.7	-24.96	-29.5
	4.1	-7.7	-9.26	-52.1
	0.8	-11.4	-23.33	-46.4
	-1.8	-4.9	-18.21	-44.8
		-8.1	-33.7
			-15.1
			-17.16
			-18.9
			-26.9
			-26
