# Supplementary material for: Subtype-specific responses of hKv7.4 and hKv7.5 channels to polyunsaturated fatty acids reveal an unconventional modulatory site and mechanism
Source: eLife. 2022 Jun 1;11:e77672. doi: 10.7554/eLife.77672 (PMC9159753; doi:10.7554/eLife.77672)
Supplement: Figure 7—source data 1. [file elife-77672-fig7-data1.xlsx]

## Sheet: Figure 7
DV50 DHA					DV50 DHA-me				DV50 DHA+				DV50 AA+
Kv7.4 WT	Kv7.4 R213Q	Kv7.4 R216Q	Kv7.4 R219Q		Kv7.4 R213Q	Kv7.4 R216Q	Kv7.4 R219Q		Kv7.4 R213Q	Kv7.4 R216Q	Kv7.4 R219Q		Kv7.4 R213Q	Kv7.4 R216Q	Kv7.4 R219Q
20.578	-10.53	-6.57	-6.97		-0.47	3.53	2.12		2.06	-0.47	3.31		2.82	4.86	1.71
4.926	-10.01	-5.36	-5.84		-0.71	-3.15	1.32		3.55	2.17	4.13		1.75	0.17	7.13
18.02	-10.35	-5.23	-7.98		-0.38	3.81	3.37		1.22	-1.32	4.17		4.37	16.49	4.71
21.856	-8.24	-6.83	-6.16		-0.55	5.16	2.11		1.97	3.68	2.03		3.41	6.67	5.29
16.902	-4.63	-6.94	-9.77		0.04	0.51	2.94		2.02	2.42	-2.49		2.71	2.18	4.88
7.785	-9.33	-3.31	-6.76		-0.02	3.28	-0.37		4.78	2.94	2.02		3.49	3.18	4.64
7.6577
10.217
11.804
4.2754
9.792
5.446
11.268
13.85
12.79
