# Supplementary material for: Subtype-specific responses of hKv7.4 and hKv7.5 channels to polyunsaturated fatty acids reveal an unconventional modulatory site and mechanism
Source: eLife. 2022 Jun 1;11:e77672. doi: 10.7554/eLife.77672 (PMC9159753; doi:10.7554/eLife.77672)
Supplement: Table 2—source data 1. [file elife-77672-table2-data1.xlsx]

## Sheet: Table II
Kv7.4 V50								Kv7.5 V50			Kv7.4/7.5 V50			Kv7.4/E4 V50
	WT	F182L	R213Q	R216Q	R219Q	S273A			WT			WT			WT
	-8.4	-18.7	-5.431	-28.72	6.393	-6.5			-39.28			-22.31			-10.67
	-0.9	-19.2	-3.258	-32.88	9.266	-20.5			-38.2			-20.96			-8.622
	-3.9	-13.5	-6.551	-27.62	8.593	-6.9			-49.69			-25.06			-8.674
	-1.9	-11.9	-1.405	-31.58	8.899	3			-42.64			-23.04			-17.95
	-5	-13.1	-1.832	-28.76	8.001	-12.5			-37.71			-22.53			-18.39
	-10.23	-14.6	-3.85	-28.78	8.96	-1.5			-38.61			-20.52			-6.022
	-11.12	-27.94	-5.431	-28.72	6.393	-19.04			-43.66			-21.39			-20.13
	-8.444	-28.17	-3.258	-32.88	9.266	-36.89			-46.13			-23.73
	-20.46	-21.67	-6.551	-27.62	8.593	-34.39			-43.51			-24.14
	-19.3	-41.54	-1.405	-31.58	8.899	-35.36			-43.59			-23.54
	-12.99		-1.832	-28.76	8.001	-15.64			-38.98			-18.98
	-13.84		-3.85	-28.78	8.96	-15.81			-41.37			-23.26
	-13.21		5.479	-27.35	15.36	-10.69			-43.69			-22.75
	-8.71		4.4	-19.76	15.84	-15.29			-40.24			-22.23
	-20.52		8.408	-23.7	8.659	-9.881			-38.88			-26.29
	-21.64		9.645	-28.4	10.37				-42.7			-27.02
	-16.62		11.75	-19.23	12.39				-43.95			-26.29
	-4.562		11.81	-22.72	18.02				-44.54			-18.18
	-11.95		6.042	-27.27	15.63				-35.44
	-8.344		7.63	-22	18.1				-43.67
			11.98	-26.85	19.43				-44.73
			14.59	-20.35	22.2				-43.83
			12.26	-20.68	21.54				-44.64
			11.59	-21.53	21.67
			-0.4461	-29.12	8.565
			0.203	-27.18	5.132
			6.415	-23.29	11.84
			4.694	-29.28	13.93
			1.33	-28.31	12.8
			4.419	-27.65	16.44
